# Supplementary material
Source: Springer Nature journal article supplement (https://www.springermedizin.de/resource/supplementary/12889_2010_3092_MOESM10_ESM.pdf/9488156)

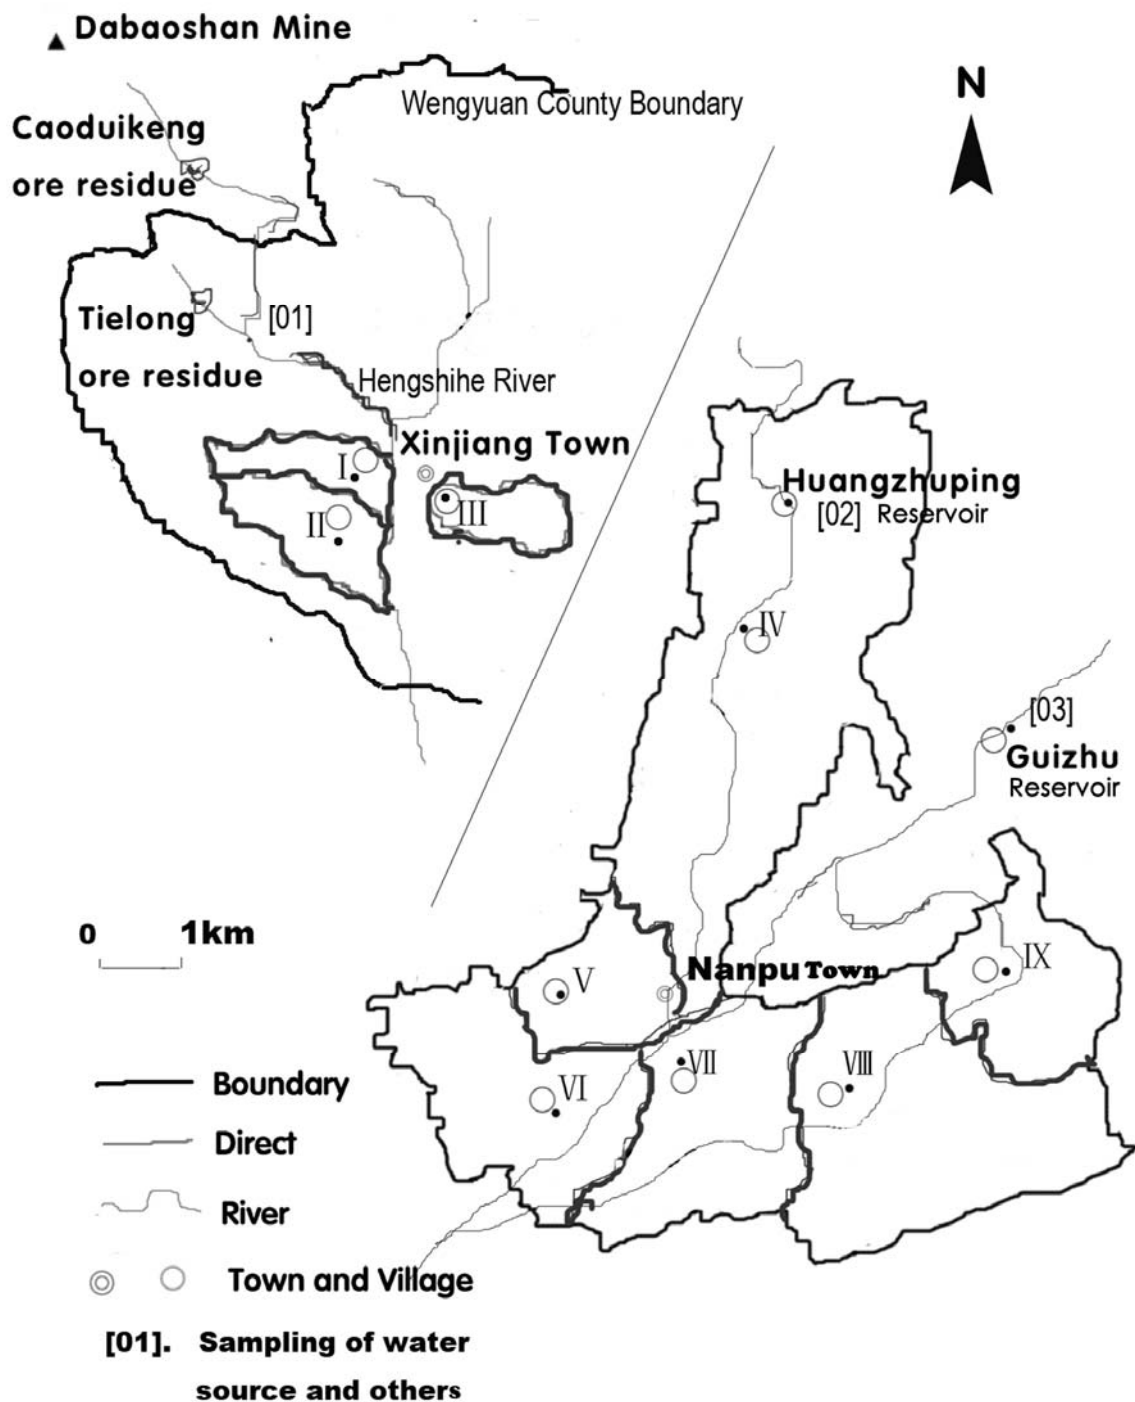

Supplement: MOESM10 [file 9488156]
